# Supplementary material for: Urban Scaling of Cities in the Netherlands
Source: PLoS One. 2016 Jan 11;11(1):e0146775. doi: 10.1371/journal.pone.0146775 (PMC4708983; doi:10.1371/journal.pone.0146775)
Supplement: S1 File — (XLSX) [file pone.0146775.s003.xlsx]

## Sheet: Set 1
Urban Scaling of Cities in the Netherlands, Set 1
	population 2010/12	GUP 2010/11
Doetinchem	56132.3	2085.18
Haarlem	150689	4574.73
Katwijk	62116	1451.22
Leiden	117929	4500.15
Leidschendam-Voorburg	72211	1566.6
's-Gravenhage	495230	20793
Zoetermeer	121925	3800.56
Alkmaar	94022	3851.57
Heerhugowaard	51882	1579.9
Arnhem	148120	6506.03
Nijmegen	164123	6327.05
Delft	97708.3	3526.3
Westland	100491	4100.97
Almere	190659	4321.62
Lelystad	75017	2749.84
Amstelveen	81951.3	3646.29
Amsterdam	779125	44945.4
Haarlemmermeer	143368	11825.8
Purmerend	79165.7	2117.97
Capelle aan den IJssel	65857	3100.99
Lansingerland	53973.3	1682.12
Rotterdam	606565	29201.2
Schiedam	75842.3	2714.48
Spijkenisse	72253.3	1617.65
Vlaardingen	70948	1739.17
Hilversum	85031.3	3618.86
Velsen	67304.7	2184.8
Den Helder	57225	1868.01
Hoorn	70734.3	2086.55
Roermond	55657.3	3293.87
Tilburg	206224	7815.36
Assen	67080.7	3067.24
Leeuwarden	94744	5197.33
Venlo	100040	4318.01
Oss	82077.3	2908.69
's-Hertogenbosch	140762	7956.51
Hardenberg	59242.3	1501.11
Kampen	50386.3	1301.36
Zwolle	120304	6331.7
Alphen aan den Rijn	72689	2215.31
Gouda	71134.7	2664.06
Groningen	190139	9233
Almelo	72652.7	2696.71
Enschede	157646	5295.26
Hengelo	80819.3	3037.2
Amersfoort	146568	6415.39
Nieuwegein	60854.3	3538.54
Utrecht	311574	18585.6
Veenendaal	62396.7	2243.91
Zeist	60781	2780.28
Apeldoorn	156295	6004.06
Barneveld	53012.3	1901.11
Ede	108268	3473.1
Bergen op Zoom	66016.3	2459.03
Breda	174766	8073.48
Roosendaal	77511	3043.95
Oosterhout	54071.3	2053.18
Zaanstad	146851	3857.8
Terneuzen	54814.3	2653.61
Heerlen	89154.7	4093.16
Maastricht	119749	5362.33
Sittard-Geleen	94864	3843.74
Emmen	109196	4298.24
Smallingerland	55387.7	1855.52
Eindhoven	215690	12281.5
Helmond	88550.7	3013.92
Dordrecht	118717	3985.25
Hoogeveen	54846	2046.39
Deventer	98644	3142.09

## Sheet: Set 2
Urban Scaling of Cities in the Netherlands, Set 2
	population					number of jobs					GUP in million Euro
	31/12 2011	31/12 2012	31/12 2013			31/12 2011	31/12 2012	31/12 2013			2011	2012	2013
Alblasserdam	19208	19467	19643		Alblasserdam	8550	10040	9230		Alblasserdam	593.177	699.923	649.931
Albrandswaard	25003	25101	25069		Albrandswaard	8900	8750	9330		Albrandswaard	695.511	700.013	759.015
Almere	193163	195213	196013		Almere	65010	64440	68370		Almere	4531.34	4390.33	4794.86
Amersfoort	148250	149662	150897		Amersfoort	83530	83700	82290		Amersfoort	6300.14	6397.21	6357.22
Amstelveen	83363	84379	85015		Amstelveen	42770	43320	39660		Amstelveen	3844.02	3939.35	3649.93
Amsterdam	790110	799278	810937		Amsterdam	542020	532290	538230		Amsterdam	48714.8	48404.3	49533.5
Apeldoorn	156961	157315	157545		Apeldoorn	92000	95790	94220		Apeldoorn	6057.56	6319.98	6290.31
Arnhem	149271	149827	150823		Arnhem	104170	102100	95850		Arnhem	6912.7	6814.49	6586.25
Barendrecht	47053	47371	47377		Barendrecht	25100	24190	23250		Barendrecht	1961.5	1935.24	1891.44
Bedum	10508	10553	10494		Bedum	2900	3160	2870		Bedum	357.007	417.676	404.103
Beek	16457	16367	16271		Beek	7590	7190	7510		Beek	513.731	482.603	510.547
Bernisse	12426	12398	12368		Bernisse	2800	2900	2760		Bernisse	218.812	232.004	224.532
Best	28696	28637	28617		Best	18180	17710	16790		Best	1362.75	1326.1	1270.96
Beuningen	25433	25324	25288		Beuningen	6410	6490	6660		Beuningen	425.366	433.164	457.636
Beverwijk	39844	40070	40093		Beverwijk	21130	20180	19150		Beverwijk	1464.09	1338.6	1313.05
Bloemendaal	22056	22195	22059		Bloemendaal	4830	5120	4880		Bloemendaal	336.573	351.401	348.571
Borne	21586	21770	21884		Borne	5620	5580	5290		Borne	345.887	345.901	334.231
Breda	176401	178140	179623		Breda	104780	102530	101570		Breda	7833.13	7613.41	7713.86
Brielle	16072	16320	16312		Brielle	4720	4590	4510		Brielle	368.855	367.207	366.898
Brunssum	29199	29081	28958		Brunssum	7330	6880	6860		Brunssum	496.133	461.796	466.359
Bunnik	14451	14563	14626		Bunnik	7250	7150	7520		Bunnik	546.822	546.476	580.949
Bunschoten	20200	20316	20492		Bunschoten	10170	10190	10130		Bunschoten	767.059	778.823	782.581
Capelle aan den IJssel	66122	66024	66178		Capelle aan den IJssel	39950	39610	36240		Capelle aan den IJssel	3121.99	3168.86	2948.2
Castricum	34474	34402	34288		Castricum	7410	7310	7110		Castricum	513.436	484.896	487.509
Dalfsen	27432	27570	27674		Dalfsen	9450	9250	8640		Dalfsen	585.278	573.562	547.59
De Bilt	42079	42032	42036		De Bilt	15690	16220	16360		De Bilt	1183.4	1239.7	1263.87
Delft	98675	99097	100046		Delft	52490	52100	51660		Delft	3450.85	3426.14	3467.41
Diemen	24935	25218	25930		Diemen	31570	33450	19210		Diemen	2837.4	3041.81	1767.9
Dordrecht	118862	118466	118691		Dordrecht	54980	54660	52710		Dordrecht	3814.37	3810.54	3711.58
Drimmelen	26664	26737	26695		Drimmelen	7190	6990	6860		Drimmelen	537.509	519.046	520.991
Duiven	25525	25554	25609		Duiven	13790	13690	13970		Duiven	915.101	913.716	959.937
Eijsden-Margraten	24994	25049	24979		Eijsden-Margraten	5780	5850	5030		Eijsden-Margraten	391.221	392.661	341.951
Eindhoven	217225	218433	220920		Eindhoven	160240	158080	160640		Eindhoven	12011.4	11836.8	12160
Enschede	158048	158627	158586		Enschede	79310	79080	76290		Enschede	4881.2	4902.13	4820.12
Epe	32519	32385	32351		Epe	10450	10020	10970		Epe	688.06	661.094	732.379
Etten-Leur	42048	42274	42357		Etten-Leur	21490	22440	21600		Etten-Leur	1606.55	1666.29	1640.44
Geldrop-Mierlo	38671	38768	38854		Geldrop-Mierlo	11810	11720	11690		Geldrop-Mierlo	885.263	877.577	884.903
Gilze en Rijen	25589	25858	26069		Gilze en Rijen	14110	13490	12650		Gilze en Rijen	871.025	850.63	807.71
Goirle	22805	22933	23098		Goirle	7610	6740	6880		Goirle	469.773	425	439.292
Groesbeek	18884	19009	18977		Groesbeek	6420	6610	5580		Groesbeek	426.03	441.173	383.425
Groningen	193127	195418	198317		Groningen	130940	128810	126320		Groningen	16119.5	17025.6	17786.1
Haarlem	151818	153093	155147		Haarlem	67310	66300	64110		Haarlem	4690.42	4550.37	4579.29
Haarlemmerliede en Spaarnwoude	5474	5526	5535		Haarlemmerliede en Spaarnwoude	1540	1600	1690		Haarlemmerliede en Spaarnwoude	107.313	109.813	120.714
Haarlemmermeer	143943	144153	144061		Haarlemmermeer	141670	145440	148400		Haarlemmermeer	12732.8	13225.7	13657.3
Hardinxveld-Giessendam	17654	17722	17758		Hardinxveld-Giessendam	7750	7260	6840		Hardinxveld-Giessendam	537.675	506.12	481.639
Haren	18457	18642	18782		Haren	6670	5900	5610		Haren	821.115	779.839	789.901
Hattem	11805	11769	11732		Hattem	3260	3200	3260		Hattem	214.648	211.128	217.644
Heemskerk	39268	39117	39088		Heemskerk	9530	9730	9060		Heemskerk	660.33	645.422	621.214
Heemstede	26242	26317	26364		Heemstede	7490	7580	7110		Heemstede	521.932	520.238	507.857
Heerde	18244	18399	18490		Heerde	6640	6310	6310		Heerde	437.198	416.318	421.268
Heerlen	89016	88747	88259		Heerlen	57850	55670	55630		Heerlen	3915.59	3736.65	3781.86
Hellevoetsluis	39442	39086	38953		Hellevoetsluis	9390	8850	8770		Hellevoetsluis	733.803	708.013	713.458
Hendrik-Ido-Ambacht	28257	28641	28911		Hendrik-Ido-Ambacht	7160	6800	7200		Hendrik-Ido-Ambacht	496.743	474.052	506.988
Hengelo	80939	80952	80957		Hengelo	45840	44430	43910		Hengelo	2821.26	2754.19	2774.3
het Bildt	10798	10646	10626		het Bildt	2760	2690	2750		het Bildt	184.322	183.976	196.283
Heumen	16413	16455	16334		Heumen	4360	4290	4010		Heumen	289.329	286.329	275.544
Hilvarenbeek	15047	15086	15092		Hilvarenbeek	4090	4260	4240		Hilvarenbeek	252.48	268.62	270.726
Houten	48309	48429	48421		Houten	24720	23040	23130		Houten	1864.47	1760.95	1786.88
IJsselstein	34271	34254	34275		IJsselstein	10680	10410	9880		IJsselstein	805.525	795.638	763.268
Katwijk	62476	62688	62782		Katwijk	21020	21440	21110		Katwijk	1453.86	1474.52	1479
Kerkrade	47280	47194	46784		Kerkrade	14940	14650	14140		Kerkrade	1011.22	983.329	961.27
Krimpen aan den IJssel	28692	28855	28825		Krimpen aan den IJssel	8360	8000	7770		Krimpen aan den IJssel	653.312	640.012	632.106
Landgraaf	38067	37911	37573		Landgraaf	9450	10450	8650		Landgraaf	639.626	701.419	588.047
Landsmeer	10334	10454	10444		Landsmeer	1780	1870	1900		Landsmeer	159.98	170.05	174.858
Leek	19467	19611	19597		Leek	8610	7890	7840		Leek	1059.94	1042.87	1103.89
Leeuwarden	95321	95949	107342		Leeuwarden	68370	63690	63230		Leeuwarden	4565.97	4355.93	4513.08
Leeuwarderadeel	10332	10314	10278		Leeuwarderadeel	2220	2250	2220		Leeuwarderadeel	148.259	153.884	158.454
Leiden	118748	119800	121163		Leiden	66060	69150	69250		Leiden	4569.09	4755.73	4851.77
Leiderdorp	26706	26743	26813		Leiderdorp	11840	11050	9450		Leiderdorp	818.922	759.954	662.082
Leidschendam-Voorburg	72405	72588	73356		Leidschendam-Voorburg	20530	20550	19380		Leidschendam-Voorburg	1605.05	1600.4	1518.22
Leusden	28905	28969	28997		Leusden	12210	11810	12180		Leusden	920.924	902.64	940.952
Lingewaard	45770	45818	45776		Lingewaard	11940	11940	11190		Lingewaard	792.336	796.915	768.911
Losser	22673	22554	22612		Losser	6120	6350	6280		Losser	376.66	393.633	396.78
Maassluis	31849	31985	32080		Maassluis	6860	7350	7110		Maassluis	536.091	588.011	578.413
Maastricht	121050	121819	122488		Maastricht	71940	69730	70730		Maastricht	4869.28	4680.38	4808.39
Marum	10413	10382	10378		Marum	2490	2450	2450		Marum	306.533	323.831	344.966
Meerssen	19430	19362	19254		Meerssen	4000	3790	3890		Meerssen	270.741	254.39	264.451
Menameradiel	13773	13727	13673		Menameradiel	2740	2390	2420		Menameradiel	182.986	163.458	172.729
Midden-Delfland	18225	18251	18456		Midden-Delfland	5420	5490	5760		Midden-Delfland	356.327	361.027	386.611
Mook en Middelaar	7874	7827	7796		Mook en Middelaar	1530	1610	1590		Mook en Middelaar	89.5139	94.4293	92.4175
Muiden	6466	6393	6287		Muiden	1450	1550	1470		Muiden	118.26	123.92	120.213
Nederlek	13992	14131	14075		Nederlek	3690	3580	3590		Nederlek	288.364	286.405	292.054
Nieuwegein	60720	60895	61038		Nieuwegein	45190	43710	41550		Nieuwegein	3408.4	3340.76	3209.9
Nijkerk	40126	40355	40638		Nijkerk	17350	17310	17340		Nijkerk	1142.38	1142.07	1157.65
Nijmegen	165182	166382	168292		Nijmegen	100590	96070	95870		Nijmegen	6675.13	6412.03	6587.63
Noordenveld	30955	31024	31087		Noordenveld	8480	8570	8480		Noordenveld	531.653	523.105	525.867
Noordwijk	25517	25671	25691		Noordwijk	12590	11670	11660		Noordwijk	870.796	802.594	816.918
Noordwijkerhout	15648	15740	15956		Noordwijkerhout	7270	6860	6500		Noordwijkerhout	502.835	471.79	455.4
Nuenen, Gerwen en Nederwetten	22548	22645	22620		Nuenen, Gerwen en Nederwetten	7680	6090	5870		Nuenen, Gerwen en Nederwetten	575.683	456.011	444.344
Nuth	15644	15494	15583		Nuth	5380	5230	5000		Nuth	364.147	351.045	339.911
Oegstgeest	22788	23153	22910		Oegstgeest	5940	5590	5620		Oegstgeest	410.844	384.447	393.746
Oisterwijk	25775	25770	25802		Oisterwijk	9420	9480	8680		Oisterwijk	581.506	597.774	554.223
Oldenzaal	32176	32200	32137		Oldenzaal	19350	18980	17970		Oldenzaal	1190.91	1176.56	1135.37
Onderbanken	7966	7905	7881		Onderbanken	690	620	650		Onderbanken	46.7028	41.6153	44.1885
Oosterhout	54006	53686	53717		Oosterhout	26020	26630	25550		Oosterhout	1945.2	1977.42	1940.43
Oostzaan	9097	9141	9139		Oostzaan	2320	2530	2480		Oostzaan	208.513	230.068	228.235
Ouder-Amstel	13232	13249	13271		Ouder-Amstel	6710	6720	6410		Ouder-Amstel	603.071	611.09	589.915
Overbetuwe	46269	46531	46665		Overbetuwe	15000	15620	16220		Overbetuwe	995.397	1042.53	1114.54
Papendrecht	32032	32082	32117		Papendrecht	13570	13990	14020		Papendrecht	941.452	975.292	987.219
Pijnacker-Nootdorp	50103	50454	51071		Pijnacker-Nootdorp	13280	13440	13230		Pijnacker-Nootdorp	1038.24	1046.69	1036.43
Purmerend	79266	79482	79576		Purmerend	25070	24530	24090		Purmerend	2253.2	2230.66	2217.01
Renkum	31630	31565	31580		Renkum	9470	10240	9740		Renkum	628.427	683.452	669.276
Rheden	43612	43679	43640		Rheden	13160	13010	12310		Rheden	873.295	868.331	845.871
Ridderkerk	45208	45330	45253		Ridderkerk	20110	19800	19070		Ridderkerk	1571.54	1584.03	1551.38
Rijswijk	46990	47372	47634		Rijswijk	34190	31550	30320		Rijswijk	2673	2457.06	2375.26
Rotterdam	616260	616294	618357		Rotterdam	373550	367660	357860		Rotterdam	29191.9	29413.4	29112.7
Rozendaal	1514	1501	1503		Rozendaal	510	500	520		Rozendaal	33.8435	33.3717	35.7314
Schiedam	76244	76216	76450		Schiedam	34640	33410	32120		Schiedam	2707.02	2672.85	2613.03
Schinnen	13202	12950	12901		Schinnen	2510	2440	2450		Schinnen	169.89	163.776	166.557
s-Gravenhage	502055	505856	508940		s-Gravenhage	264680	264710	263220		s-Gravenhage	20692.9	20615.2	20620.6
s-Hertogenbosch	141893	142817	143733		s-Hertogenbosch	101320	102320	101050		s-Hertogenbosch	7141.5	7213.73	7320.29
Simpelveld	10914	10920	10844		Simpelveld	2030	1860	1690		Simpelveld	137.401	124.846	114.89
Sint-Michielsgestel	28128	28040	28121		Sint-Michielsgestel	6810	6850	6300		Sint-Michielsgestel	480	482.936	456.386
Sittard-Geleen	94535	94024	93691		Sittard-Geleen	51840	51300	48990		Sittard-Geleen	3508.8	3443.33	3330.45
Sliedrecht	24232	24389	24528		Sliedrecht	14960	15870	14990		Sliedrecht	1037.89	1106.35	1055.52
Soest	45612	45508	45493		Soest	16700	15820	15180		Soest	1259.58	1209.13	1172.71
Son en Breugel	15822	16138	16235		Son en Breugel	12190	12360	12670		Son en Breugel	913.747	925.5	959.087
Spijkenisse	72171	72375	72561		Spijkenisse	21140	19730	18590		Spijkenisse	1652.03	1578.43	1512.34
Stein	25623	25431	25390		Stein	7340	7640	7420		Stein	496.81	512.808	504.429
Stichtse Vecht	63315	63491	63856		Stichtse Vecht	17980	18210	18610		Stichtse Vecht	1356.12	1391.79	1437.69
Ten Boer	7477	7500	7479		Ten Boer	1340	1290	1230		Ten Boer	164.962	170.507	173.187
Teylingen	35686	35800	35735		Teylingen	14060	13410	13890		Teylingen	972.47	922.261	973.156
Tilburg	207580	208527	210270		Tilburg	123140	117660	114460		Tilburg	7601.56	7419.21	7308.34
Tynaarlo	32357	32456	32493		Tynaarlo	9370	9420	9210		Tynaarlo	587.452	574.989	571.136
Tytsjerksteradiel	32164	31979	31973		Tytsjerksteradiel	8040	7650	7360		Tytsjerksteradiel	536.937	523.204	525.325
Ubbergen	9387	9504	9451		Ubbergen	2320	4080	4230		Ubbergen	153.955	272.313	290.661
Uitgeest	12897	13061	13234		Uitgeest	3230	3210	3130		Uitgeest	223.805	212.93	214.614
Utrecht	316275	321916	328164		Utrecht	243030	249190	245970		Utrecht	18330.2	19045.6	19002.1
Valkenburg aan de Geul	16945	16814	16675		Valkenburg aan de Geul	5800	5510	5440		Valkenburg aan de Geul	392.574	369.839	369.824
Valkenswaard	30666	30584	30335		Valkenswaard	11850	11670	11130		Valkenswaard	888.261	873.833	842.513
Veldhoven	43880	44092	44155		Veldhoven	24880	25570	25160		Veldhoven	1864.97	1914.65	1904.55
Velsen	67286	67122	67220		Velsen	31870	32550	32780		Velsen	2208.26	2159.15	2247.61
Vlaardingen	71042	70905	70981		Vlaardingen	22010	22870	22120		Vlaardingen	1720.02	1829.63	1799.51
Voerendaal	12664	12617	12454		Voerendaal	2490	2200	1930		Voerendaal	168.536	147.667	131.206
Voorschoten	24310	24658	24951		Voorschoten	5230	5040	4850		Voorschoten	361.737	346.621	339.799
Voorst	23719	23724	23767		Voorst	9540	9790	9490		Voorst	628.143	645.919	633.571
Vught	25789	25564	25638		Vught	10910	11020	10490		Vught	768.987	776.928	759.919
Waalre	16503	16725	16765		Waalre	5330	4960	4320		Waalre	399.53	371.398	327.013
Wassenaar	25762	25656	25675		Wassenaar	8340	8280	7250		Wassenaar	652.027	644.833	567.963
Waterland	17010	17091	17134		Waterland	3050	3250	3060		Waterland	274.123	295.542	281.613
Westervoort	15294	15199	15138		Westervoort	1990	1900	1930		Westervoort	132.056	126.812	132.618
Westland	101980	102698	103241		Westland	61190	61630	60250		Westland	4022.82	4052.84	4043.97
Westvoorne	13901	13890	13964		Westvoorne	2980	2890	3040		Westvoorne	232.879	231.204	247.31
Wijchen	40734	41004	41043		Wijchen	14080	13520	13580		Wijchen	934.346	902.37	933.138
Winsum	13987	13906	13850		Winsum	2460	2380	2060		Winsum	302.84	314.579	290.053
Wormerland	15781	15740	15777		Wormerland	3560	3490	3460		Wormerland	244.237	243.382	244.787
Zaanstad	148281	149622	150598		Zaanstad	54530	53930	54040		Zaanstad	3741.08	3760.92	3823.21
Zandvoort	16651	16593	16575		Zandvoort	4280	4320	4320		Zandvoort	298.247	296.495	308.571
Zeevang	6344	6317	6341		Zeevang	1140	1110	1410		Zeevang	102.459	100.939	129.763
Zeist	61233	61420	61250		Zeist	36600	36220	34840		Zeist	2760.51	2768.3	2691.52
Zoetermeer	122331	123092	123561		Zoetermeer	49820	49190	47990		Zoetermeer	3894.96	3830.84	3759.52
Zoeterwoude	8171	8122	8075		Zoeterwoude	6670	7000	6830		Zoeterwoude	461.335	481.419	478.521
Zuidhorn	18681	18699	18775		Zuidhorn	3810	3690	3710		Zuidhorn	469.033	487.73	522.376
Zundert	21221	21241	21399		Zundert	6420	6820	6850		Zundert	479.946	506.422	520.232
Zwijndrecht	44499	44610	44547		Zwijndrecht	18880	18770	18520		Zwijndrecht	1309.85	1308.52	1304.09
Zwolle	121527	122562	123159		Zwolle	94550	94530	92790		Zwolle	5855.88	5861.49	5880.88
